# Supplementary material
Source: PubMed Central journal article supplement (PMC4297660)
Supplement: NIHMS338439-supplement-1_si_001.pdf [file NIHMS338439-supplement-1_si_001.pdf]

# Supplementary Information for “Water transport through nanotubes with varying interaction strength between tube wall and water” by Mathew Melillo, Fangqiang Zhu, Mark A. Snyder, and Jeetain Mittal\*

\*[jeetain@lehigh.edu](mailto:jeetain@lehigh.edu)

## 1. Lennard-Jones Potential between nanotube atoms and water

The Lennard-Jones Potential is a model to describe the interactions between a nanotube atom (NT) and water’s oxygen atom (OW). The interaction energy depends on the distance between the two atoms in question,  $r$ , as well as the parameters of  $\epsilon_{\text{NT-OW}}$  and  $\sigma_{\text{NT-OW}}$ . Here,  $\epsilon_{\text{NT-OW}}$  represents the potential energy well depth, which is the point at which the molecules or atoms are a distance of  $r_{\text{min}}$  from each other and have potential energy,  $U = -\epsilon_{\text{NT-OW}}$ . The resulting potential functions are also shown in Figure S1.

Table1. Lennard-Jones potential parameters used

| $\epsilon_{\text{NT-OW}}$ (kcal/mol) | $r_{\text{min}}$ (Å) | $\sigma_{\text{NT-OW}}$ (Å) |
|--------------------------------------|----------------------|-----------------------------|
| 0.0200                               | 4.1812               | 3.7250                      |
| 0.0400                               | 3.9679               | 3.5350                      |
| 0.0500                               | 3.9000               | 3.4745                      |
| 0.0525                               | 3.8875               | 3.4634                      |
| 0.0550                               | 3.8750               | 3.4522                      |
| 0.0575                               | 3.8625               | 3.4411                      |
| 0.0600                               | 3.8500               | 3.4300                      |
| 0.0625                               | 3.8350               | 3.4166                      |
| 0.0650                               | 3.8250               | 3.4077                      |
| 0.0675                               | 3.8200               | 3.4032                      |
| 0.0700                               | 3.8100               | 3.3943                      |
| 0.0725                               | 3.8000               | 3.3854                      |
| 0.0750                               | 3.7900               | 3.3765                      |
| 0.0775                               | 3.7800               | 3.3676                      |
| 0.0800                               | 3.7715               | 3.3600                      |
| 0.1000                               | 3.7154               | 3.3100                      |
| 0.1200                               | 3.6648               | 3.2650                      |
| 0.1400                               | 3.6256               | 3.2300                      |
| 0.1600                               | 3.5919               | 3.2000                      |
| 0.1800                               | 3.5638               | 3.1750                      |
| 0.2000                               | 3.5414               | 3.1550                      |

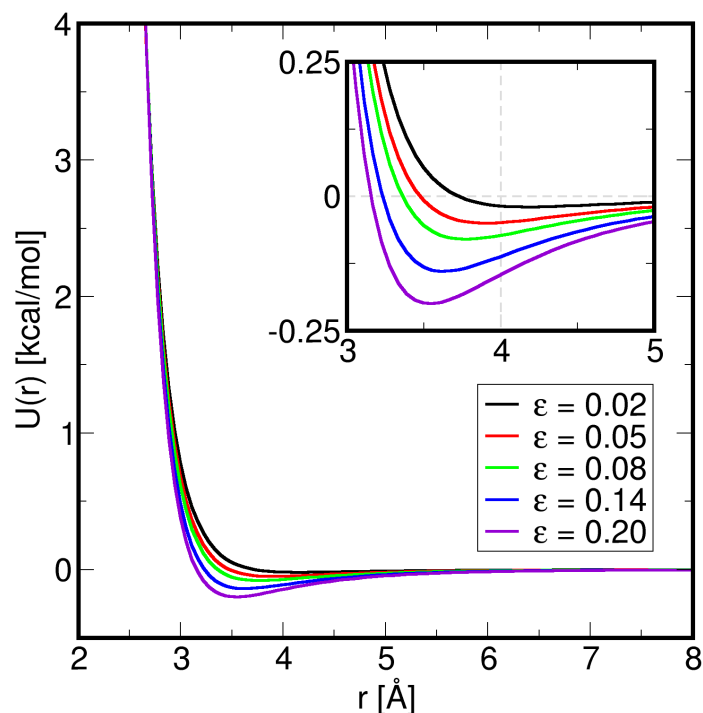

**Figure S1: Potential energy  $U(r)$  versus distance between a nanotube atom and water's oxygen for different  $\epsilon_{\text{NT-OW}}$  values (the inset shows a zoomed-in view).**

## **2. Comparison of permeation events between our membrane system (3x4 nanotubes) and a single nanotube system**

To verify that the membrane system used to accumulate data doesn't affect our results for flow through a nanotube, we have also performed a set of simulations with a setup utilizing a single nanotube (6,6) immersed in water. As we show in Figure S2, the results are comparable between the 'membrane' and 'single tube' simulation setups.

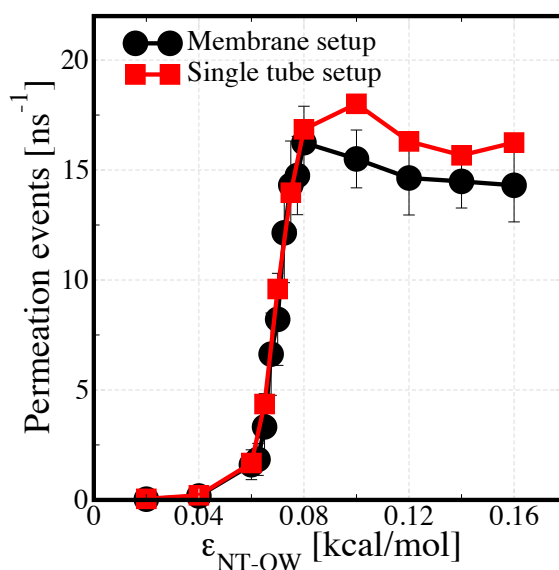

**Figure S2: Effect of system setup, membrane versus single nanotube, on observed water flow through a nanotube.**

### 3. Effect of changing $\sigma_{\text{NT-OW}}$ for a given interaction strength $\epsilon_{\text{NT-OW}}$

Consistent with previous studies [1-3], we have changed the nanotube atom's diameter for different  $\epsilon_{\text{NT-OW}}$  to make sure that repulsive part of the potential (Figure S1) is the same. To see how keeping this diameter or therefore  $\sigma_{\text{NT-OW}}$  constant ( $\sigma_{\text{NT-OW}} = 3.2751 \text{ \AA}$  which corresponds to carbon nanotube as used previously in the literature) for different  $\epsilon_{\text{NT-OW}}$  values will (not) affect our results, we have generated a data set for (6,6) nanotubes. As shown below in Figure S3, the permeation events are largely insensitive to this change.

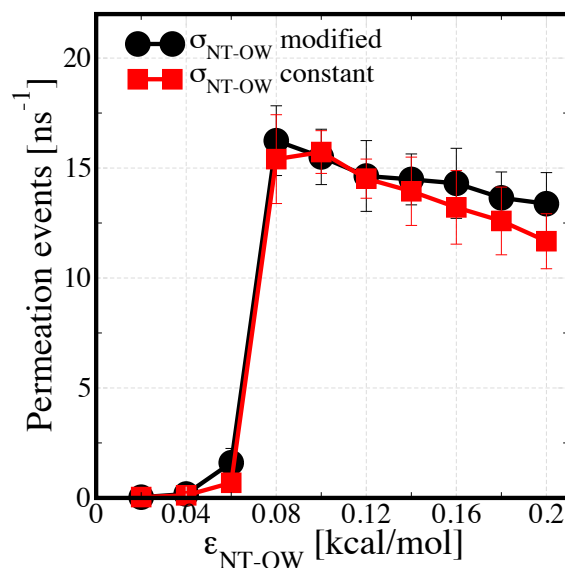

Figure S3: Effect of  $\sigma_{\text{NT-OW}}$  (see section 1) on observed permeation rates.

### 4. Simulation setup details

Table 2. List of simulation systems and runtime considered in this study

| Nanotube (n,m) | Length (nm) | $\epsilon_{\text{NT-OW}}$ range (kcal/mol) | Equilibration time (ps) | Production time (ns) | Number of water molecules |
|----------------|-------------|--------------------------------------------|-------------------------|----------------------|---------------------------|
| (6,6)          | 1.34        | 0.02-0.2                                   | 200                     | 15                   | 1541                      |
| (7,7)          | 1.34        | 0.02-0.2                                   | 200                     | 15                   | 1924                      |
| (8,8)          | 1.34        | 0.02-0.2                                   | 200                     | 15                   | 2346                      |
| (9,9)          | 1.34        | 0.02-0.2                                   | 200                     | 15                   | 2910                      |
| (12,12)        | 1.34        | 0.02-0.2                                   | 200                     | 15                   | 4972                      |
| (12,12)        | 1.34        | 0.04-0.06                                  | 200                     | 100                  | 4972                      |
| (6,6)          | 5.6         | 0.02-0.2                                   | 400                     | 30                   | 1706                      |
